# Supplementary material for: Effect of Support on the Activity of Ag-based Catalysts for Formaldehyde Oxidation
Source: PubMed Central journal article supplement (PMC4531785; doi:10.1038/srep12950), 2015-08-11
Supplement: srep12950-s1.pdf [file srep12950-s1.pdf]

# **Effect of Support to the Activity of Ag-based Catalysts for Formaldehyde Oxidation**

Jianghao Zhang, Yaobin Li, Yan Zhang, Min Chen, Lian Wang, Changbin Zhang\*,  
Hong He.

State Key Joint Laboratory of Environment Simulation and Pollution Control,  
Research Center for Eco-Environmental Sciences, Chinese Academy of Sciences  
Beijing, 100085, China.

\*Corresponding author: Phone: 86-10-62849121; fax: 86-10-62849121; e-mail:

[cbzhang@rcees.ac.cn](mailto:cbzhang@rcees.ac.cn)

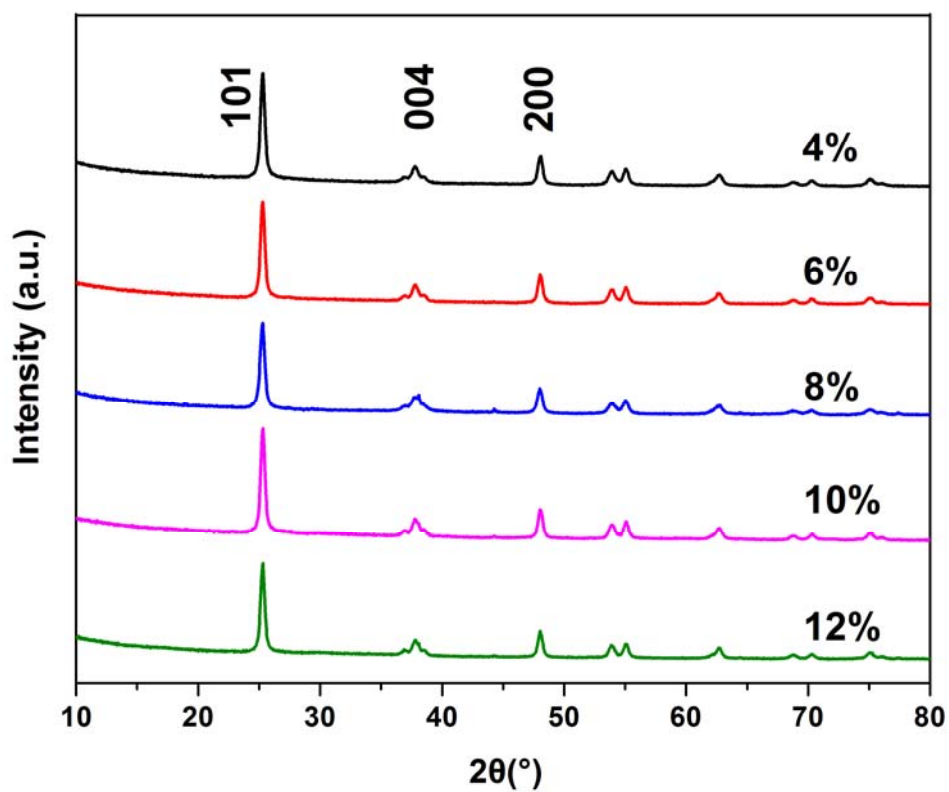

Figure S1. XRD patterns of the Ag/TiO<sub>2</sub> catalysts with Ag contents of 4, 6, 8, 10, 12 wt %.

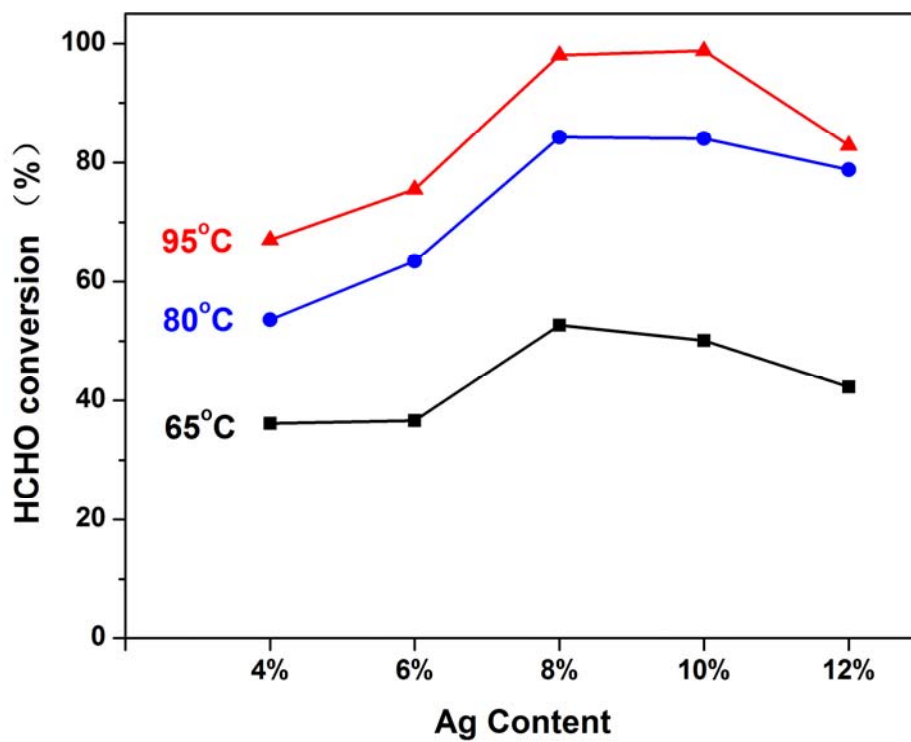

Figure S2. HCHO conversion over Ag/TiO<sub>2</sub> with Ag contents of 4, 6, 8, 10, 12 wt %. Reaction condition: 110 ppm of HCHO, 20% O<sub>2</sub>, N<sub>2</sub> balance, GHSV=100 000 mL (g<sub>cat</sub>·h)<sup>-1</sup>.
